# Supplementary material for: The COMPASs Study: Community Preferences for Prostate cAncer Screening. Protocol for a quantitative preference study
Source: PubMed Central journal article supplement — BMJ Open. 2012 Jan 7;2(1):e000587. doi: 10.1136/bmjopen-2011-000587 (PMC3253419; doi:10.1136/bmjopen-2011-000587), 2012-01-07
Supplement: bmjopen-2011-000587.draft_revisions.pdf [file bmjopen-2011-000587.draft_revisions.pdf]

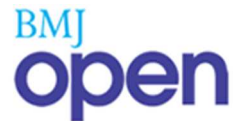

**The COMPASs Study - Community Preferences for Prostate  
cAncer Screening. Protocol for a quantitative preference  
study**

|                                    |                                                                                                                                                                                                                                                                                                                                                                                                                                                             |
|------------------------------------|-------------------------------------------------------------------------------------------------------------------------------------------------------------------------------------------------------------------------------------------------------------------------------------------------------------------------------------------------------------------------------------------------------------------------------------------------------------|
| Journal:                           | <i>BMJ Open</i>                                                                                                                                                                                                                                                                                                                                                                                                                                             |
| Manuscript ID:                     | bmjopen-2011-000587                                                                                                                                                                                                                                                                                                                                                                                                                                         |
| Article Type:                      | Protocol                                                                                                                                                                                                                                                                                                                                                                                                                                                    |
| Date Submitted by the Author:      | 04-Nov-2011                                                                                                                                                                                                                                                                                                                                                                                                                                                 |
| Complete List of Authors:          | Howard, Kirsten; University of Sydney, School of Public Health<br>Salkeld, Glenn; University of Sydney, School of Public Health<br>Mann, Graham; University of Sydney, Western Clinical School, Westmead<br>Millenium Institute<br>Patel, Manish; University of Sydney, Discipline of Surgery<br>Cunich, Michelle; University of Sydney, School of Public Health<br>Pignone, Michael; University of North Carolina - Chapel Hill, Department of<br>Medicine |
| <b>Primary Subject<br>Heading</b>: | Public health                                                                                                                                                                                                                                                                                                                                                                                                                                               |
| Secondary Subject Heading:         | Health services research                                                                                                                                                                                                                                                                                                                                                                                                                                    |
| Keywords:                          | prostate cancer, screening, preferences                                                                                                                                                                                                                                                                                                                                                                                                                     |
|                                    |                                                                                                                                                                                                                                                                                                                                                                                                                                                             |

SCHOLARONE™  
Manuscripts

1  
2  
3 **The COMPASs Study - Community Preferences for Prostate cAncer Screening. Protocol for a quantitative**  
4 **preference study**  
5  
6  
7

8 Kirsten Howard<sup>1§</sup>, Glenn P Salkeld<sup>1</sup>, Graham J. Mann<sup>2</sup>, Manish I. Patel<sup>3</sup>, Michelle Cunich<sup>1</sup>, Michael P  
9 Pignone<sup>4</sup>  
10

11  
12  
13 1. School of Public Health, University of Sydney, NSW, 2006, Australia

14 2. Western Clinical School, University of Sydney at Westmead Millenium Institute, NSW, 2006, Australia

15 3. Discipline of Surgery, University of Sydney, NSW, 2006, Australia

16 4. Department of Medicine, University of North Carolina- Chapel Hill, NC, USA  
17  
18  
19  
20  
21  
22  
23

24 § Corresponding author  
25  
26  
27

28 Email:

29  
30 KH: [kirsten.howard@sydney.edu.au](mailto:kirsten.howard@sydney.edu.au)

31  
32 GPS: [glenn.salkeld@sydney.edu.au](mailto:glenn.salkeld@sydney.edu.au)

33  
34 GJM: [graham.mann@sydney.edu.au](mailto:graham.mann@sydney.edu.au)

35  
36 MIP: [manish.patel@sydney.edu.au](mailto:manish.patel@sydney.edu.au)

37  
38 MC: [michelle.cunich@sydney.edu.au](mailto:michelle.cunich@sydney.edu.au)

39  
40 MPP: [Michael\\_Pignone@med.unc.edu](mailto:Michael_Pignone@med.unc.edu)  
41  
42  
43  
44  
45  
46  
47  
48  
49  
50  
51  
52  
53  
54  
55  
56  
57  
58  
59  
60

**Abstract****Background**

Prostate cancer screening using PSA (prostate specific antigen) testing remains controversial. Trade-offs between the potential benefits and downsides of screening must be weighed by men deciding whether to participate in prostate cancer screening; little is known about benefit:harm trade-offs men are willing to accept.

**Methods/Design**

The COMPASs Study examines Australian men's preferences for prostate cancer screening using PSA testing. The aims are to 1) determine which factors influence men's decision to participate in prostate cancer screening or not and 2) determine the extent of trade-offs between benefits and harms that men are willing to accept in making these decisions. Quantitative methods will be used to assess men's preferences for PSA screening.

Using data on the quantitative outcomes of PSA testing from the published literature, a discrete choice study will be designed to quantitatively assess men's preferences. A web-based survey will be conducted in approximately 1000 community respondents aged 40-69, stratified by family history of prostate cancer, to assess men's preferences for PSA testing. A mixed logit model will be used; model results will be expressed as parameter estimates ( $\beta$ ) and the odds of choosing screening over no screening. Trade-offs between attributes will also be calculated.

**Discussion:**

By providing a better understanding of men's preferences for PSA screening for prostate cancer, the COMPASs study will highlight the factors that most influence men's choices to be screened or not, as well as the tradeoffs between them that they are willing to accept. These data can be used by both clinicians and patients to facilitate an informed discussion of the most relevant benefits and downsides of PSA testing for an individual man. In addition, results will help inform future research and policy directions, such that efforts can be focussed on factors of most importance to consumers.

## Background

Screening for prostate cancer using PSA testing remains controversial. Recently published evidence suggests that prostate cancer screening using PSA testing may offer some benefits in terms of reducing prostate cancer specific mortality; no trials have demonstrated a reduction in overall mortality associated with screening [1;2]. However, these same trials also report evidence of substantial harms: men who participate in screening have a significantly higher likelihood of being diagnosed with prostate cancer than those not screened, including the diagnosis of cancers that would not have become clinically apparent within the man's lifetime, meaning more men experiencing the attendant harms of diagnosis and treatment such as unnecessary biopsies from false positive PSA tests, or impotence and /or incontinence from treatments [1-3]. In deciding whether to undergo prostate cancer screening, men therefore need to weigh up these potential benefits with the potential risks, harms and costs associated with screening.

Adding to the complexity and uncertainty in this decision making environment are the somewhat conflicting recommendations regarding the value of prostate cancer screening: The American Urological Association recommends PSA screening be offered to all men aged 40 or older [4]. Other US groups recommend discussion of the potential benefits and harms of PSA screening in the context of a clinical consultation, with an emphasis on informed decision making and consideration of patient preferences (The American Cancer Society [5], The American College of Physicians [6]). In Australia, the Cancer Council of Australia's position on prostate cancer indicates "there is no national screening program in place, with current evidence showing that the PSA test is not suitable for population screening as the harms outweigh the benefits. Whether or not to be tested for prostate cancer is a matter of individual choice..." [7]. The most recent draft guidelines from the US Preventive Services Task Force (USPSTF) go one step further and assign a "D" rating to PSA screening "recommends against prostate-specific antigen (PSA)-based screening for prostate cancer... [for] men in the U.S. population that do not have symptoms that are highly suspicious for prostate cancer, regardless of age, race, or family history [8]. This revised recommendation will replace the 2008 recommendation [9] which had previously concluded that in men younger than 75 years, there was insufficient evidence to make a recommendation ("I" rating).

## Consumer preferences for screening

1  
2  
3 Over recent years there has been an increasing recognition of the role and importance of preferences and  
4 values in not only individual clinical decisions, but also in shaping public health policy. Preference sensitive  
5 care refers to care where there are significant potential trade-offs amongst possible positive and negative  
6 outcomes; decisions regarding these interventions should necessarily reflect an individual's personal values  
7 and preferences, and should be made only after individuals have considered sufficient information to make  
8 an informed choice [10]. It has recently been suggested that prostate cancer screening should be viewed  
9 as preference sensitive care [11].

10  
11  
12  
13  
14  
15  
16  
17 There is an extensive body of literature quantifying preferences and trade-offs for bowel cancer screening  
18 (for example [12-16]), however, despite the clear balance between harms and benefits in the context of  
19 PSA screening for prostate cancer, there has, to date, been little exploration of these issues. With possible  
20 benefits to screening in terms of prostate cancer specific mortality reduction, there is also evidence of  
21 significant and multiple potential downsides. A decision about whether to participate in prostate cancer  
22 screening therefore requires consideration of the balance between these benefits and downsides. Where  
23 that balance sits for an individual man is highly personal, and driven by his own preferences about the  
24 extent of trade-offs between benefits and harms that he is willing to accept. For this reason, the  
25 preferences of the individual should be paramount.

26  
27  
28  
29  
30  
31  
32  
33  
34  
35  
36 The aims of the COMPASs study are therefore to

- 37 - determine the relative importance of various factors that influence men's decision to participate in
- 38 prostate cancer screening or not and
- 39 - determine the extent of trade-offs between benefits and harms that men are willing to accept in
- 40 making decisions about participation in screening.
- 41
- 42
- 43
- 44
- 45
- 46

47 By providing a better understanding of how men value particular aspects of prostate cancer screening, and  
48 the trade-offs between benefits and harms of PSA screening that they are willing to accept, the COMPASs  
49 study will provide vital information 1) for clinicians and consumers to facilitate an informed discussion of  
50 the potential benefits and downsides of PSA testing; 2) to inform health policy regarding the development  
51 of any possible future public screening program such that any program can be closely aligned to  
52 community attitudes and preferences and 3) highlight future research directions such that research and  
53 subsequent policy development can be focussed in areas of most importance to consumers.

## Methods/Design

### Overview of approach and methods

The COMPASS study will utilise quantitative discrete choice methods to assess men's preferences for prostate cancer screening.

### Discrete choice experiments (DCEs)

Discrete choice experiments involve surveys in which respondents are asked to choose between hypothetical alternatives defined by a set of differing attributes. This method is becoming more widely used in health as a means of quantifying patient and consumer preferences for health care policies and programs [17-20]. The method is based on the idea that goods and services, including health care services, can be described in terms of a number of separate attributes or factors. The levels of attributes are varied systematically in a series of questions and respondents choose the option that they prefer for each question. People are assumed to choose the option that is most preferred, or has the highest 'value'. From these choices, a mathematical function is estimated which describes numerically the value that respondents attach to different choice options. Other data collected in the survey, including attitudinal questions and sociodemographic information, may also enter the value functions as explanatory variables. Ultimately, DCE studies can determine which attributes are driving patient preferences, the trade-offs people make between attributes, and how changes in attributes can lead to changes in preferences and likely service uptake.

Figure 1 illustrates an example from an Australian survey of consumer preferences for colorectal cancer screening tests [16]. The example involves two unlabelled alternative tests (Figure 1) described using five different attributes (how many cancers the test will find, how many large polyps the test will find, the number of people correctly reassured that they do NOT have cancer, cost, dietary and medication restrictions, stool sample collection), each set at specific levels. By presenting respondents with a series of choices where the levels of the attributes are varied, researchers are able to quantify how these attributes influence choice. In this example, the analysis indicates consumer preferences for immunochemical faecal occult blood testing as a screening test for colorectal cancer.

**Figure 1**

Given a sufficient number of choices to allow variation across all attributes, this approach enables estimates of the marginal effect of each attribute on choice and the marginal rate of substitution or trade-offs between attributes. In principle this can be done by offering respondents choices using every combination of attributes; a 'full factorial' design. In practice such a design is rarely feasible; efficient designs are therefore paramount, particularly when considering multiple choice options and interactions between attributes and socio-demographic characteristics on choice.

The following section details the specific methods that will be applied in the COMPASs study; we will follow the ISPOR Guidelines for Good Research Practices for conjoint analysis in health [20].

**Study Methods****Stage 1: Deciding attributes and levels**

A systematic review of the literature will be conducted to ascertain attributes for inclusion. These will include PSA test performance characteristics, such as potential mortality benefits from screening, number of diagnoses of prostate cancer, as well as harms such as the number of men experiencing false positive PSA results and subsequent unnecessary biopsies, potential harms associated with downstream treatment of prostate cancer, such as impotence and urinary or faecal incontinence [21] and out of pocket costs. Our existing published model [3] will be used to estimate these outcomes in men who screen and who don't screen, over a 10 year time frame. Model outputs, and therefore attribute levels, will be stratified by age and risk based upon family history.

**Stage 2 Design of Discrete choice questionnaires**

Once the attributes have been decided based on Stage 1, a design for the discrete choice studies will be created. Statistically efficient designs will be used. This approach to design links statistical efficiency to the likely econometric model that is to be estimated from choice data using the design [22;23]. This approach relaxes the orthogonality constraint and attempts to minimise the expected asymptotic variance-covariance (AVC) matrix of the design. Efficient choice (EC) designs therefore attempt to maximise the

likely asymptotic  $t$ -ratios obtained from choice data collected. As such, they attempt to minimize the correlation in the data for estimation purposes, and collect data such that parameter estimates have as small as possible standard errors. These designs make use of the fact that the AVC matrix (the roots of the diagonal of this matrix are the asymptotic standard errors) of the parameters can be derived if the parameters are known. Since the objective of the DCE is to estimate these parameters, they are unknown at the time of design. However, if some prior information about these parameters is available (e.g., parameter estimates available in the literature from similar studies, or parameter estimates from pilot studies), then this AVC matrix can be determined, assuming that the priors are correct.

An initial EC design will be created, based on the likely *a priori* sign of parameters. This initial design will be piloted in a sample of 100 respondents, and preliminary models estimated. Parameter estimates from the models will be used to generate the final efficient designs for the main discrete choice study.

In addition to the discrete choice questions, information on socioemographic characteristics of respondents will also be collected for each survey.

### **Stage 3: DCE Survey**

**Respondents:** Men aged 40-69 of low, moderate and high risk of prostate cancer, based upon family history of prostate cancer, will be recruited to complete the DCE survey. Low risk men are those with no first-degree relatives (FDR) affected by prostate cancer. Men with one affected FDR are considered at moderate risk and men with either two or more affected FDR, or one FDR diagnosed at a young age (<60 years) are considered high risk. Based on their age and family history of prostate cancer, they will be allocated to a version of the survey with attribute levels relevant to their age and risk.

The DCE will be conducted using a web-based survey. Respondents will be recruited through a market research company with an existing online panel and experience in administering online choice based surveys. Upon consent, the potential respondent will be referred the online site to complete the discrete choice survey. Respondents will be asked to choose between three labelled alternatives, two screening options and a no screening option (opt-out).

**Sample Size:** The current theory of sampling for these experiments does not directly address the issue of minimum sample size requirements in terms of the reliability of the parameter estimates produced in the design of stated choice experiments (see for example, [24;25]). Rather, sampling theory as applied to choice modelling is designed to minimise the error in the choice proportions of the alternatives under study. This means that the final sample size required is based upon the characteristics of the design itself



1  
2  
3 such as the number of attributes included, the attribute level range, the number of choice scenarios  
4 presented, the number of alternatives in each choice set and the size and direction of prior parameters  
5 obtained from the pilot study. Taking into account the Australian population distribution of men aged 40-  
6 69 with different levels of family history of prostate cancer (low, no FDR ~94% of the population aged 40-  
7 69; moderate, 1 FDR ~5-6%; high, 2 FDR or 1 FDR diagnosed < 60 yrs ~0.5%), and to ensure sufficient  
8 numbers in risk sub-group for robust parameter estimates and that we are able to explore interactions  
9 between attributes and between attributes and sociodemographic factors, and present subgroup analyses  
10 we anticipate a sample size of approximately 1000 respondents (550 (low); 350 (moderate); 100 (high))

#### 18 **Stage 4: Analysis**

19 A mixed multinomial logit (MMNL) (also known as random parameters logit, RPL) model using a panel size  
20 specification will be used. A panel specification of the model allows for non-independence of observations  
21 provided by the same respondent; that is, it can account for correlations amongst the multiple choices  
22 made by the same individual. MMNL models relax certain statistical assumptions of more commonly used  
23 multinomial logit (MNL) models, and often lead to models that better explain choice behaviour [24]. In MNL  
24 choice models, commonly used in health economics, parameters associated with each attribute are  
25 treated as fixed. These fixed values are the average (or point estimates) associated with a population level  
26 distribution; other information in the distribution is not considered. A MMNL allows consideration of the full  
27 distribution of a parameter estimate, and the fixed parameter becomes a random parameter. 'Random  
28 parameter' simply implies that each individual has an associated parameter estimate on that specified  
29 distribution. Whilst the exact location of each individual's preferences on the distribution may not be  
30 known, estimates of 'individual-specific preferences' can be accommodated by deriving the individual's  
31 conditional distribution, based – within sample – on their choices (i.e. prior knowledge) [26]. Interactions  
32 between attributes in the discrete choice surveys, and between attributes and population characteristics  
33 (for example, age, family history of prostate cancer, prior PSA testing, prior prostate biopsy, marital status,  
34 education, income) will be explored in the mixed logit analysis for both studies.

35 Model results will expressed as parameter estimates ( $\beta$ ), the odds of choosing screening over no screening  
36 (and 95% confidence intervals of the odds ratios) and p-values. Acceptable trade-offs between attributes  
37 will also be calculated.

#### 57 **Ethics & Dissemination**

#### 59 **Ethical Approval**

1  
2  
3 The COMPASs study has been approved by the University of Sydney, Human Research Ethics committee  
4 (Protocol number 13186).  
5

6  
7 Confidentiality and anonymity of the data will be strictly maintained. Participants will not be identifiable in  
8 any publications. It will be made clear to all participants that they have the right to withdraw from the  
9 research at any point in time.  
10

11  
12 As the DCE survey will be conducted as an online survey, written consent is not possible. As such  
13 participant information for the online survey includes the following statement "Being in this study is  
14 completely voluntary - you are not under any obligation to consent and - if you do consent - you can  
15 withdraw at any time without affecting your relationship with The University of Sydney. By completing the  
16 survey you have consented to be part of the study. You may stop completing the online survey at any point  
17 if you do not wish to continue, and we will not use your answers". As the survey is administered online, the  
18 study team will not have access to any information that could be used to identify respondents.  
19  
20  
21  
22  
23  
24  
25  
26  
27

### 28 **Dissemination**

29  
30 The results will be published in internal reports, in peer-reviewed scientific journals as well as via  
31 conference presentations. The results of the study will also be available to the public on the ABC project  
32 website ([http://](http://www.ABCproject.eu)  
33  
34  
35  
36 [www.ABCproject.eu](http://www.ABCproject.eu)) and via press releases in each of the participating countries.  
37  
38  
39  
40  
41  
42

### 43 **Discussion**

44  
45 The COMPASs study is a comprehensive analysis of men's preferences for prostate cancer screening.  
46 Using best practice quantitative methods COMPASs will provide an understanding of the preferences of  
47 Australian men on prostate cancer screening using PSA testing. Specifically, the aims of the COMPASs  
48 study are to 1) determine the relative importance of various factors that influence men's decision to choose  
49 prostate cancer screening or not and 2) determine the extent of trade-offs between benefits and harms  
50 that men are willing to accept in making decisions about participation in screening.  
51  
52  
53  
54  
55  
56  
57

58 The analysis will provide:  
59  
60

- 1  
2  
3  
4  
5  
6  
7  
8  
9  
10  
11  
12  
13  
14  
15  
16  
17  
18  
19  
20  
21  
22  
23  
24  
25  
26  
27  
28  
29
- Estimates of the marginal effect (importance) of each attribute on the decision to screen or not, e.g. if a cost attribute is presented, the analysis will provide an estimate of relative importance of out of pocket cost on a man's decision to undergo prostate cancer screening.
  - Estimates of marginal rates of substitution between attributes based on the ratio of parameter estimates, giving an indication of the extent to which respondents are prepared to trade-off one attribute for another. E.g. if the number of deaths due to prostate cancer and the number of men experiencing incontinence are offered as attributes in the survey, the marginal rate of substitution between these reflects the increase in the number of men experiencing incontinence that men are willing to accept as a trade-off to prevent one extra prostate cancer death.
  - An indication of the predicted uptake associated with different parameter levels within the estimated utility functions. This allows forecasting of, for instance, the likely level of uptake of screening given particular test characteristics, policy criteria and socio-demographic characteristics.

30  
31  
32  
33  
34  
35  
36  
37  
38  
39  
40  
41  
42  
43  
44  
45  
46  
47  
48  
49  
50  
51  
52  
53  
54  
55  
56  
57  
58  
59  
60

By providing a better understanding of how men value particular aspects of prostate cancer screening, and the trade-offs between benefits and harms of PSA screening that they are willing to accept, the COMPASs study will provide vital information 1) for clinicians and consumers to facilitate an informed discussion of the potential benefits and downsides of PSA testing; 2) to inform health policy regarding the development of any possible future public screening program such that any program can be closely aligned to community attitudes and preferences and 3) highlight future research directions such that research and subsequent policy development can be focussed in areas of most importance to consumers.

**Competing Interests**

The authors declare that they have no competing interests.

**Authors' contributions**

KH conceived the original concept of this study. All authors contributed to discussion and revisions to the study design and approved the final study design. KH drafted the manuscript, all other authors were involved in overall revision of the manuscript. All authors are involved in the implementation of the project, and have read and approved the final manuscript.

**Acknowledgements and Funding**

The COMPASs study is funded by the National Health and Medical Research Council of Australia under program grant 633003 (The Screening and Test Evaluation Program (STEP))

## Reference List

- 1  
2  
3  
4  
5  
6  
7 (1) Schroder FH, Hugosson J, Roobol MJ, et al. Screening and prostate-cancer mortality in a  
8 randomized European study. *N Engl J Med* 2009;360(13):1320-8.
- 9  
10 (2) Andriole G, Grubb RL, Buys SS, et al. Mortality results from a randomized prostate-cancer screening  
11 trial. *N Engl J Med* 2009;360(13):1310-9.
- 12  
13 (3) Howard K, Barratt A, Mann GJ, et al. A model of prostate-specific antigen screening outcomes for  
14 low- to high-risk men: information to support informed choices. *Archives of Internal Medicine* 2009  
15 Sep 28;169(17):1603-10.
- 16  
17 (4) American Urological Association. Can Prostate Cancer be found early? (Cited October 2011).  
18 2009;Available from: URL: [http://www.auanet.org/content/guidelines-and-quality-care/policy-  
19 statements/e/early-detection-of-prostate-cancer.cfm](http://www.auanet.org/content/guidelines-and-quality-care/policy-statements/e/early-detection-of-prostate-cancer.cfm)
- 20  
21 (5) American Cancer Society. Can Prostate Cancer be found early? (Cited October 2011). 2010;  
22 Available from: URL:  
23 [http://www.cancer.org/docroot/CRI/content/CRI\\_2\\_4\\_3X\\_Can\\_prostate\\_cancer\\_be\\_found\\_early\\_36.asp?sitearea](http://www.cancer.org/docroot/CRI/content/CRI_2_4_3X_Can_prostate_cancer_be_found_early_36.asp?sitearea)
- 24  
25 (6) American College of Physicians. Screening for prostate cancer. *Annals of Internal Medicine*  
26 1997;126(480):484.
- 27  
28 (7) Cancer Council Australia. Position Statement - Prostate Cancer. (accessed 18 October 2011).  
29 2010 Available from: URL:  
30 <http://www.cancer.org.au/policy/positionstatements/prostatecancer.htm>
- 31  
32 (8) US Preventive Services. Screening for Prostate Cancer: U.S. Preventive Services Task Force  
33 Recommendation Statement (DRAFT - Accessed 18 October 2011). 2011 Available from: URL:  
34 <http://www.uspreventiveservicestaskforce.org/draftrec3.htm>
- 35  
36 (9) US Preventive Services. Screening for Prostate Cancer. 2008 [cited 2008 Jun 2];Available from:  
37 URL: <http://www.ahrq.gov/clinic/uspstf/uspsprca.htm>
- 38  
39 (10) Dartmouth Atlas Project. Preference sensitive care. A Dartmouth Atlas Project Topic Brief.  
40 Internet 2011 Available from: URL:  
41 [http://www.dartmouthatlas.org/downloads/reports/preference\\_sensitive.pdf](http://www.dartmouthatlas.org/downloads/reports/preference_sensitive.pdf)
- 42  
43 (11) O'Donnell J. Help me in my confusion: should we think more about mammography and  
44 colonoscopy as "preference sensitive care"? *Journal of Cancer Education* 2010;25(4):471-2.
- 45  
46 (12) Gyrd-Hansen D, Sogaard J. Analysing public preferences for cancer screening programs. *Health*  
47 *Economics* 2001;10:617-34.
- 48  
49 (13) Marshall DA, Johnson FR, Phillips KA, et al. Measuring patient preferences for colorectal cancer  
50 screening using a choice-format survey. *Value in Health* 2007 Sep;10(5):415-30.
- 51  
52 (14) Marshall DA, McGregor E, Currie G. Measuring preferences for colorectal cancer (CRC) screening –  
53 What are the implications for moving forward? *The Patient - Patient Centred Outcomes Research*  
54 2010;3(2):79-89.
- 55  
56 (15) Salkeld G, Solomon M, Short L, et al. Evidence-based consumer choice: a case study in colorectal  
57 cancer screening. *Australian & New Zealand Journal of Public Health* 2003;27(4):449-55.
- 58  
59 (16) Howard K, Salkeld G. Does Attribute Framing in Discrete Choice Experiments Influence Willingness  
60 to Pay? Results from a Discrete Choice Experiment in Screening for Colorectal Cancer. *Value in Health* 2009;121(2):354-3.

- 1  
2  
3 (17) Lancsar E, Louviere J. Conducting discrete choice experiments to inform healthcare decision  
4 making: a user's guide. *Pharmacoeconomics* 2008;26(8):661-77.  
5  
6 (18) Bridges JF, Kinter E, Kidane L, et al. Things are looking up since we started listening to patients:  
7 Recent trends in the application of conjoint analysis in health 1970-2007. *The Patient - Patient*  
8 *Centred Outcomes Research* 2008;1(4):273-82.  
9  
10 (19) Marshall DA, Bridges JF, Hauber AB, et al. Conjoint Analysis Applications in Health - How are  
11 studies being designed and reported? An update on current practice in the published literature  
12 between 2005 and 2008. *The Patient - Patient Centred Outcomes Research* 2010;3(4):249-56.  
13  
14 (20) Bridges JF, Hauber AB, Marshall DA, et al. Conjoint Analysis Applications in Health-a Checklist: A  
15 Report of the ISPOR Good Research Practices for Conjoint Analysis Task Force. *Value in Health*  
16 2011;14(4):5.  
17  
18 (21) Smith DP, King MT, Egger S, et al. Quality of life three years after diagnosis of localised prostate  
19 cancer: population based cohort study. *BMJ* 2009;339:b4817.  
20  
21 (22) Huber J., Zwerina K. The importance of utility balance in efficient choice design. *Journal of*  
22 *Marketing Research* 1996;XXXIII:307-17.  
23  
24 (23) Sandor Z, Wedel M. Profile construction in experimental designs for mixed logit models. *Marketing*  
25 *Science* 2002;21(4):455-75.  
26  
27 (24) Hensher DA, Rose JM, Greene WH. *Applied Choice Analysis. A Primer* (1st ed.). Cambridge:  
28 Cambridge University Press, 2005.  
29  
30 (25) Louviere J, Hensher DA, Swait JD. *Stated Choice Methods - Analysis and Application*. Cambridge:  
31 Cambridge University Press, 2000.  
32  
33 (26) Hensher DA, Greene WH. The mixed logit model: The state of practice. *Transportation*  
34 2003;30:133-76.  
35  
36  
37  
38  
39  
40  
41  
42  
43  
44  
45  
46  
47  
48  
49  
50  
51  
52  
53  
54  
55  
56  
57  
58  
59  
60

## Figures

## Figure 1 Example of a discrete choice question

Please compare the two screening tests below. You have decided to have a screening test, and these are the two tests you have to choose from. Which test would you choose to have?

| Example                                                                                   | Test 1                                          | Test 2                                          |
|-------------------------------------------------------------------------------------------|-------------------------------------------------|-------------------------------------------------|
| How many cancers the test will find                                                       | 65 out of 100                                   | 55 out of 100                                   |
| How many large polyps the test will find                                                  | 35 out of 100                                   | 45 out of 100                                   |
| The number of people who are correctly reassured by the test that they do NOT have cancer | 800 out of 1000 people                          | 900 out of 1000 people                          |
| The cost to you of the test                                                               | \$20                                            | \$30                                            |
| Dietary or medication restrictions prior to test                                          | No                                              | No                                              |
| Collection of the stool sample                                                            | Brush stool surface gently then dab on test kit | Brush stool surface gently then dab on test kit |

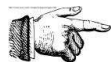

Which would you choose?

(please tick one box)

Test 1

Test 2

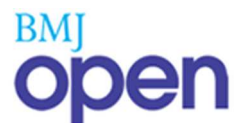

**The COMPASs Study - Community Preferences for Prostate  
cAncer Screening. Protocol for a quantitative preference  
study**

|                                    |                                                                                                                                                                                                                                                                                                                                                                                                                                                             |
|------------------------------------|-------------------------------------------------------------------------------------------------------------------------------------------------------------------------------------------------------------------------------------------------------------------------------------------------------------------------------------------------------------------------------------------------------------------------------------------------------------|
| Journal:                           | <i>BMJ Open</i>                                                                                                                                                                                                                                                                                                                                                                                                                                             |
| Manuscript ID:                     | bmjopen-2011-000587.R1                                                                                                                                                                                                                                                                                                                                                                                                                                      |
| Article Type:                      | Protocol                                                                                                                                                                                                                                                                                                                                                                                                                                                    |
| Date Submitted by the Author:      | 13-Nov-2011                                                                                                                                                                                                                                                                                                                                                                                                                                                 |
| Complete List of Authors:          | Howard, Kirsten; University of Sydney, School of Public Health<br>Salkeld, Glenn; University of Sydney, School of Public Health<br>Mann, Graham; University of Sydney, Western Clinical School, Westmead<br>Millenium Institute<br>Patel, Manish; University of Sydney, Discipline of Surgery<br>Cunich, Michelle; University of Sydney, School of Public Health<br>Pignone, Michael; University of North Carolina - Chapel Hill, Department of<br>Medicine |
| <b>Primary Subject<br>Heading</b>: | Public health                                                                                                                                                                                                                                                                                                                                                                                                                                               |
| Secondary Subject Heading:         | Health services research                                                                                                                                                                                                                                                                                                                                                                                                                                    |
| Keywords:                          | prostate cancer, screening, preferences                                                                                                                                                                                                                                                                                                                                                                                                                     |
|                                    |                                                                                                                                                                                                                                                                                                                                                                                                                                                             |

SCHOLARONE™  
Manuscripts



1  
2  
3 **The COMPASs Study - Community Preferences for Prostate cAncer Screening. Protocol for a quantitative**  
4 **preference study**  
5

6  
7  
8 Kirsten Howard<sup>1§</sup>, Glenn P Salkeld<sup>1</sup>, Graham J. Mann<sup>2</sup>, Manish I. Patel<sup>3</sup>, Michelle Cunich<sup>1</sup>, Michael P  
9 Pignone<sup>4</sup>  
10

11  
12  
13 1. School of Public Health, University of Sydney, NSW, 2006, Australia

14 2. Western Clinical School, University of Sydney at Westmead Millenium Institute, NSW, 2006, Australia

15 3. Discipline of Surgery, University of Sydney, NSW, 2006, Australia

16 4. Department of Medicine, University of North Carolina- Chapel Hill, NC, USA  
17  
18  
19  
20  
21  
22  
23

24  
25 § Corresponding author  
26  
27

28 Email:

29  
30 KH: [kirsten.howard@sydney.edu.au](mailto:kirsten.howard@sydney.edu.au)  
31

32 GPS: [glenn.salkeld@sydney.edu.au](mailto:glenn.salkeld@sydney.edu.au)  
33

34 GJM: [graham.mann@sydney.edu.au](mailto:graham.mann@sydney.edu.au)  
35

36 MIP: [manish.patel@sydney.edu.au](mailto:manish.patel@sydney.edu.au)  
37

38 MC: [michelle.cunich@sydney.edu.au](mailto:michelle.cunich@sydney.edu.au)  
39

40 MPP: [Michael\\_Pignone@med.unc.edu](mailto:Michael_Pignone@med.unc.edu)  
41  
42  
43  
44  
45  
46  
47  
48  
49  
50  
51  
52  
53  
54  
55  
56  
57  
58  
59  
60

## Abstract

### Background

Prostate cancer screening using PSA (prostate specific antigen) testing remains controversial. Trade-offs between the potential benefits and downsides of screening must be weighed by men deciding whether to participate in prostate cancer screening; little is known about benefit:harm trade-offs men are willing to accept.

### Methods/Design

The COMPASs Study examines Australian men's preferences for prostate cancer screening using PSA testing. The aims are to 1) determine which factors influence men's decision to participate in prostate cancer screening or not and 2) determine the extent of trade-offs between benefits and harms that men are willing to accept in making these decisions. Quantitative methods will be used to assess men's preferences for PSA screening.

Using data on the quantitative outcomes of PSA testing from the published literature, a discrete choice study will be designed to quantitatively assess men's preferences. A web-based survey will be conducted in approximately 1000 community respondents aged 40-69, stratified by family history of prostate cancer, to assess men's preferences for PSA testing. A mixed logit model will be used; model results will be expressed as parameter estimates ( $\beta$ ) and the odds of choosing screening over no screening. Trade-offs between attributes will also be calculated.

### Ethics and Dissemination

The COMPASs study has been approved by the University of Sydney, Human Research Ethics committee (Protocol number 13186). The results will be published in internal reports, in peer-reviewed scientific journals as well as via conference presentations.

## Background

Screening for prostate cancer using PSA testing remains controversial. Recently published evidence suggests that prostate cancer screening using PSA testing may offer some benefits in terms of reducing prostate cancer specific mortality; no trials have demonstrated a reduction in overall mortality associated with screening [1;2]. However, these same trials also report evidence of substantial harms: men who participate in screening have a significantly higher likelihood of being diagnosed with prostate cancer than those not screened, including the diagnosis of cancers that would not have become clinically apparent within the man's lifetime, meaning more men experiencing the attendant harms of diagnosis and treatment such as unnecessary biopsies from false positive PSA tests, or impotence and /or incontinence from treatments [1-3]. In deciding whether to undergo prostate cancer screening, men therefore need to weigh up these potential benefits with the potential risks, harms and costs associated with screening.

Adding to the complexity and uncertainty in this decision making environment are the somewhat conflicting recommendations regarding the value of prostate cancer screening: The American Urological Association recommends PSA screening be offered to all men aged 40 or older [4]. Other US groups recommend discussion of the potential benefits and harms of PSA screening in the context of a clinical consultation, with an emphasis on informed decision making and consideration of patient preferences (The American Cancer Society [5], The American College of Physicians [6]). In Australia, the Cancer Council of Australia's position on prostate cancer indicates "there is no national screening program in place, with current evidence showing that the PSA test is not suitable for population screening as the harms outweigh the benefits. Whether or not to be tested for prostate cancer is a matter of individual choice..." [7]. The most recent draft guidelines from the US Preventive Services Task Force (USPSTF) go one step further and assign a "D" rating to PSA screening "recommends against prostate-specific antigen (PSA)-based screening for prostate cancer... [for] men in the U.S. population that do not have symptoms that are highly suspicious for prostate cancer, regardless of age, race, or family history [8]. This revised recommendation will replace the 2008 recommendation [9] which had previously concluded that in men younger than 75 years, there was insufficient evidence to make a recommendation ("I" rating).

## Consumer preferences for screening

Over recent years there has been an increasing recognition of the role and importance of preferences and values in not only individual clinical decisions, but also in shaping public health policy. Preference sensitive

1  
2  
3 care refers to care where there are significant potential trade-offs amongst possible positive and negative  
4 outcomes; decisions regarding these interventions should necessarily reflect an individual's personal values  
5 and preferences, and should be made only after individuals have considered sufficient information to make  
6 an informed choice [10]. It has recently been suggested that prostate cancer screening should be viewed  
7 as preference sensitive care [11].  
8  
9  
10

11  
12  
13  
14 There is an extensive body of literature quantifying preferences and trade-offs for bowel cancer screening  
15 (for example [12-16]), however, despite the clear balance between harms and benefits in the context of  
16 PSA screening for prostate cancer, there has, to date, been little exploration of these issues. With possible  
17 benefits to screening in terms of prostate cancer specific mortality reduction, there is also evidence of  
18 significant and multiple potential downsides. A decision about whether to participate in prostate cancer  
19 screening therefore requires consideration of the balance between these benefits and downsides. Where  
20 that balance sits for an individual man is highly personal, and driven by his own preferences about the  
21 extent of trade-offs between benefits and harms that he is willing to accept. For this reason, the  
22 preferences of the individual should be paramount.  
23  
24  
25  
26  
27  
28  
29  
30  
31

32 The aims of the COMPASs study are therefore to

- 33 - determine the relative importance of various factors that influence men's decision to participate in  
34 prostate cancer screening or not and
- 35 - determine the extent of trade-offs between benefits and harms that men are willing to accept in  
36 making decisions about participation in screening.  
37  
38  
39  
40  
41  
42

43 By providing a better understanding of how men value particular aspects of prostate cancer screening, and  
44 the trade-offs between benefits and harms of PSA screening that they are willing to accept, the COMPASs  
45 study will provide vital information 1) for clinicians and consumers to facilitate an informed discussion of  
46 the potential benefits and downsides of PSA testing; 2) to inform health policy regarding the development  
47 of any possible future public screening program such that any program can be closely aligned to  
48 community attitudes and preferences and 3) highlight future research directions such that research and  
49 subsequent policy development can be focussed in areas of most importance to consumers.  
50  
51  
52  
53  
54  
55  
56  
57  
58  
59  
60

## Methods/Design

### Overview of approach and methods

The COMPASS study will utilise quantitative discrete choice methods to assess Australian men's preferences for prostate cancer screening.

### Discrete choice experiments (DCEs)

Discrete choice experiments involve surveys in which respondents are asked to choose between hypothetical alternatives defined by a set of differing attributes. This method is becoming more widely used in health as a means of quantifying patient and consumer preferences for health care policies and programs [17-20]. The method is based on the idea that goods and services, including health care services, can be described in terms of a number of separate attributes or factors. The levels of attributes are varied systematically in a series of questions and respondents choose the option that they prefer for each question. People are assumed to choose the option that is most preferred, or has the highest 'value'. From these choices, a mathematical function is estimated which describes numerically the value that respondents attach to different choice options. Other data collected in the survey, including attitudinal questions and sociodemographic information, may also enter the value functions as explanatory variables. Ultimately, DCE studies can determine which attributes are driving patient preferences, the trade-offs people make between attributes, and how changes in attributes can lead to changes in preferences and likely service uptake.

Figure 1 illustrates an example from an Australian survey of consumer preferences for colorectal cancer screening tests [16]. The example involves two unlabelled alternative tests (Figure 1) described using five different attributes (how many cancers the test will find, how many large polyps the test will find, the number of people correctly reassured that they do NOT have cancer, cost, dietary and medication restrictions, stool sample collection), each set at specific levels. By presenting respondents with a series of choices where the levels of the attributes are varied, researchers are able to quantify how these attributes influence choice. In this example, the analysis indicates consumer preferences for immunochemical faecal occult blood testing as a screening test for colorectal cancer.

**Figure 1**

Given a sufficient number of choices to allow variation across all attributes, this approach enables estimates of the marginal effect of each attribute on choice and the marginal rate of substitution or trade-offs between attributes. In principle this can be done by offering respondents choices using every combination of attributes; a 'full factorial' design. In practice such a design is rarely feasible; efficient designs are therefore paramount, particularly when considering multiple choice options and interactions between attributes and socio-demographic characteristics on choice.

The following section details the specific methods that will be applied in the COMPASs study; we will follow the ISPOR Guidelines for Good Research Practices for conjoint analysis in health [20].

**Study Methods****Stage 1: Deciding attributes and levels**

A systematic review of the literature will be conducted to ascertain attributes for inclusion. These will include PSA test performance characteristics, such as potential mortality benefits from screening, number of diagnoses of prostate cancer, as well as harms such as the number of men experiencing false positive PSA results and subsequent unnecessary biopsies, potential harms associated with downstream treatment of prostate cancer, such as impotence and urinary or faecal incontinence [21] and out of pocket costs. Our existing published model [3] will be used to estimate these outcomes in men who screen and who don't screen, over a 10 year time frame. Model outputs, and therefore attribute levels, will be stratified by age and risk based upon family history.

**Stage 2 Design of Discrete choice questionnaires**

Once the attributes have been decided based on Stage 1, a design for the discrete choice studies will be created. Statistically efficient designs will be used. This approach to design links statistical efficiency to the likely econometric model that is to be estimated from choice data using the design [22;23]. This approach relaxes the orthogonality constraint and attempts to minimise the expected asymptotic variance-covariance (AVC) matrix of the design. Efficient choice (EC) designs therefore attempt to maximise the likely asymptotic *t*-ratios obtained from choice data collected. As such, they attempt to minimize the

1  
2  
3 correlation in the data for estimation purposes, and collect data such that parameter estimates have as  
4 small as possible standard errors. These designs make use of the fact that the AVC matrix (the roots of the  
5 diagonal of this matrix are the asymptotic standard errors) of the parameters can be derived if the  
6 parameters are known. Since the objective of the DCE is to estimate these parameters, they are unknown  
7 at the time of design. However, if some prior information about these parameters is available (e.g.,  
8 parameter estimates available in the literature from similar studies, or parameter estimates from pilot  
9 studies), then this AVC matrix can be determined, assuming that the priors are correct.

10 An initial EC design will be created, based on the likely *a priori* sign of parameters. This initial design will  
11 be piloted in a sample of 100 respondents, and preliminary models estimated. Parameter estimates from  
12 the models will be used to generate the final efficient designs for the main discrete choice study.

13 In addition to the discrete choice questions, information on socio-demographic characteristics of  
14 respondents will also be collected for each survey.

### 25 **Stage 3: DCE Survey**

26 **Respondents:** Men aged 40-69 of low, moderate and high risk of prostate cancer, based upon family history  
27 of prostate cancer, will be recruited to complete the DCE survey. Low risk men are those with no first-  
28 degree relatives (FDR) affected by prostate cancer. Men with one affected FDR are considered at moderate  
29 risk and men with either two or more affected FDR, or one FDR diagnosed at a young age (<60 years) are  
30 considered high risk. Based on their age and family history of prostate cancer, they will be allocated to a  
31 version of the survey with attribute levels relevant to their age and risk. **No additional exclusion criteria will  
32 be applied.**

33 The DCE will be conducted using a web-based survey. Respondents will be recruited through a market  
34 research company with an existing online panel of **respondents willing to complete online surveys** and  
35 experience in administering online choice based surveys. **Recruitment will continue until the proposed  
36 sample size is reached.** Upon consent, the potential respondent will be **connected directly to** the online site  
37 to complete the discrete choice survey. Respondents will be asked to choose between three labelled  
38 alternatives, two screening options and a no screening option (opt-out).

39 **Sample Size:** The current theory of sampling for these experiments does not directly address the issue of  
40 minimum sample size requirements in terms of the reliability of the parameter estimates produced in the  
41 design of stated choice experiments (see for example, [24;25]). Rather, sampling theory as applied to  
42 choice modelling is designed to minimise the error in the choice proportions of the alternatives under  
43 study. This means that the final sample size required is based upon the characteristics of the design itself

1  
2  
3 such as the number of attributes included, the attribute level range, the number of choice scenarios  
4 presented, the number of alternatives in each choice set and the size and direction of prior parameters  
5 obtained from the pilot study. Taking into account the Australian population distribution of men aged 40-  
6 69 with different levels of family history of prostate cancer (low, no FDR ~94% of the population aged 40-  
7 69; moderate, 1 FDR ~5-6%; high, 2 FDR or 1 FDR diagnosed < 60 yrs ~0.5%), and to ensure sufficient  
8 numbers in risk sub-group for robust parameter estimates and that we are able to explore interactions  
9 between attributes and between attributes and sociodemographic factors, and present subgroup analyses  
10 we anticipate a sample size of approximately 1000 respondents (550 (low); 350 (moderate); 100 (high))

#### 18 **Stage 4: Analysis**

19 A mixed multinomial logit (MMNL) (also known as random parameters logit, RPL) model using a panel size  
20 specification will be used. A panel specification of the model allows for non-independence of observations  
21 provided by the same respondent; that is, it can account for correlations amongst the multiple choices  
22 made by the same individual. MMNL models relax certain statistical assumptions of more commonly used  
23 multinomial logit (MNL) models, and often lead to models that better explain choice behaviour [24]. In MNL  
24 choice models, commonly used in health economics, parameters associated with each attribute are  
25 treated as fixed. These fixed values are the average (or point estimates) associated with a population level  
26 distribution; other information in the distribution is not considered. A MMNL allows consideration of the full  
27 distribution of a parameter estimate, and the fixed parameter becomes a random parameter. 'Random  
28 parameter' simply implies that each individual has an associated parameter estimate on that specified  
29 distribution. Whilst the exact location of each individual's preferences on the distribution may not be  
30 known, estimates of 'individual-specific preferences' can be accommodated by deriving the individual's  
31 conditional distribution, based – within sample – on their choices (i.e. prior knowledge) [26]. Interactions  
32 between attributes in the discrete choice surveys, and between attributes and population characteristics  
33 (for example, age, family history of prostate cancer, prior PSA testing, prior prostate biopsy, marital status,  
34 education, income) will be explored in the mixed logit analysis for both studies.

35 Model results will expressed as parameter estimates ( $\beta$ ), the odds of choosing screening over no screening  
36 (and 95% confidence intervals of the odds ratios) and p-values. Acceptable trade-offs between attributes  
37 will also be calculated.

#### 57 **Ethics & Dissemination**

#### 59 **Ethical Approval**



1  
2  
3 The COMPASs study has been approved by the University of Sydney, Human Research Ethics committee  
4 (Protocol number 13186).  
5

6  
7 Confidentiality and anonymity of the data will be strictly maintained; only study staff will have access to de-  
8 identified respondent data. As respondents are being recruited by an external organisation, no individual  
9 identifying information will be ever provided to the study investigators; all respondents will be assigned a  
10 unique study ID. In addition, participants will not be identifiable in any publications. It will be made clear  
11 to all participants that they have the right to withdraw from the research at any point in time. No data  
12 monitoring committee will be required, and no interim analyses will be conducted.  
13  
14

15  
16 As the DCE survey will be conducted as an online survey, written consent is not possible. As such  
17 participant information for the online survey includes the following statement "Being in this study is  
18 completely voluntary - you are not under any obligation to consent and - if you do consent - you can  
19 withdraw at any time without affecting your relationship with The University of Sydney. By completing the  
20 survey you have consented to be part of the study. You may stop completing the online survey at any point  
21 if you do not wish to continue, and we will not use your answers". As the survey is administered by an  
22 external organisation, and is completely online, the study team will not have access to any information that  
23 could be used to identify respondents. Following study completion only study investigators will have  
24 access to the de-identified respondent data.  
25  
26  
27  
28  
29  
30  
31  
32  
33  
34  
35  
36  
37

### 38 **Dissemination**

39 The results will be published in internal reports, in peer-reviewed scientific journals as well as via  
40 conference presentations..  
41  
42  
43  
44

### 45 **Role of Funder**

46 The COMPASs study is funded under the National Health and Medical Research Council of Australia  
47 program grant 633003 (The Screening and Test Evaluation Program (STEP)). The funders have no role in  
48 study design; collection, management, analysis, and interpretation of data; nor in writing of any reports; or  
49 the decision to submit the reports for publication.  
50  
51  
52  
53  
54

### 55 **Discussion**

56 The COMPASs study is a comprehensive analysis of men's preferences for prostate cancer screening.  
57  
58 Using best practice quantitative methods COMPASs will provide an understanding of the preferences of  
59  
60

1  
2  
3 Australian men on prostate cancer screening using PSA testing. Specifically, the aims of the COMPASs  
4 study are to 1) determine the relative importance of various factors that influence men's decision to choose  
5 prostate cancer screening or not and 2) determine the extent of trade-offs between benefits and harms  
6 that men are willing to accept in making decisions about participation in screening.  
7  
8  
9

10  
11  
12 The analysis will provide:

- 13  
14  
15 - Estimates of the marginal effect (importance) of each attribute on the decision to screen or not,  
16 e.g. if a cost attribute is presented, the analysis will provide an estimate of relative importance of  
17 out of pocket cost on a man's decision to undergo prostate cancer screening.  
18  
19  
20 - Estimates of marginal rates of substitution between attributes based on the ratio of parameter  
21 estimates, giving an indication of the extent to which respondents are prepared to trade-off one  
22 attribute for another. E.g. if the number of deaths due to prostate cancer and the number of men  
23 experiencing incontinence are offered as attributes in the survey, the marginal rate of substitution  
24 between these reflects the increase in the number of men experiencing incontinence that men are  
25 willing to accept as a trade-off to prevent one extra prostate cancer death.  
26  
27  
28 - An indication of the predicted uptake associated with different parameter levels within the  
29 estimated utility functions. This allows forecasting of, for instance, the likely level of uptake of  
30 screening given particular test characteristics, policy criteria and socio-demographic  
31 characteristics.  
32  
33  
34  
35  
36  
37  
38  
39  
40  
41  
42

43 By providing a better understanding of how men value particular aspects of prostate cancer screening,  
44 and the trade-offs between benefits and harms of PSA screening that they are willing to accept, the  
45 COMPASs study will provide vital information 1) for clinicians and consumers to facilitate an informed  
46 discussion of the potential benefits and downsides of PSA testing; 2) to inform health policy regarding  
47 the development of any possible future public screening program such that any program can be closely  
48 aligned to community attitudes and preferences and 3) highlight future research directions such that  
49 research and subsequent policy development can be focussed in areas of most importance to  
50 consumers.  
51  
52  
53  
54  
55  
56  
57  
58  
59  
60

**Competing Interests**

The authors declare that they have no competing interests.

**Authors' contributions**

KH conceived the original concept of this study. All authors contributed to discussion and revisions to the study design and approved the final study design. KH drafted the manuscript, all other authors were involved in overall revision of the manuscript. All authors are involved in the implementation of the project, and have read and approved the final manuscript.

**Acknowledgements and Funding**

The COMPASs study is funded by the National Health and Medical Research Council of Australia under program grant 633003 (The Screening and Test Evaluation Program (STEP))

## Reference List

- 1  
2  
3  
4  
5  
6  
7 (1) Schroder FH, Hugosson J, Roobol MJ, et al. Screening and prostate-cancer mortality in a  
8 randomized European study. *N Engl J Med* 2009;360(13):1320-8.
- 9  
10 (2) Andriole G, Grubb RL, Buys SS, et al. Mortality results from a randomized prostate-cancer screening  
11 trial. *N Engl J Med* 2009;360(13):1310-9.
- 12  
13 (3) Howard K, Barratt A, Mann GJ, et al. A model of prostate-specific antigen screening outcomes for  
14 low- to high-risk men: information to support informed choices. *Archives of Internal Medicine* 2009  
15 Sep 28;169(17):1603-10.
- 16  
17 (4) American Urological Association. Can Prostate Cancer be found early? (Cited October 2011).  
18 2009;Available from: URL: [http://www.auanet.org/content/guidelines-and-quality-care/policy-  
19 statements/e/early-detection-of-prostate-cancer.cfm](http://www.auanet.org/content/guidelines-and-quality-care/policy-statements/e/early-detection-of-prostate-cancer.cfm)
- 20  
21 (5) American Cancer Society. Can Prostate Cancer be found early? (Cited October 2011). 2010;  
22 Available from: URL:  
23 [http://www.cancer.org/docroot/CRI/content/CRI\\_2\\_4\\_3X\\_Can\\_prostate\\_cancer\\_be\\_found\\_early\\_36.asp?sitearea](http://www.cancer.org/docroot/CRI/content/CRI_2_4_3X_Can_prostate_cancer_be_found_early_36.asp?sitearea)
- 24  
25 (6) American College of Physicians. Screening for prostate cancer. *Annals of Internal Medicine*  
26 1997;126(480):484.
- 27  
28 (7) Cancer Council Australia. Position Statement - Prostate Cancer. (accessed 18 October 2011).  
29 2010 Available from: URL:  
30 <http://www.cancer.org.au/policy/positionstatements/prostatecancer.htm>
- 31  
32 (8) US Preventive Services. Screening for Prostate Cancer: U.S. Preventive Services Task Force  
33 Recommendation Statement (DRAFT - Accessed 18 October 2011). 2011 Available from: URL:  
34 <http://www.uspreventiveservicestaskforce.org/draftrec3.htm>
- 35  
36 (9) US Preventive Services. Screening for Prostate Cancer. 2008 [cited 2008 Jun 2];Available from:  
37 URL: <http://www.ahrq.gov/clinic/uspstf/uspSprca.htm>
- 38  
39 (10) Dartmouth Atlas Project. Preference sensitive care. A Dartmouth Atlas Project Topic Brief.  
40 Internet 2011 Available from: URL:  
41 [http://www.dartmouthatlas.org/downloads/reports/preference\\_sensitive.pdf](http://www.dartmouthatlas.org/downloads/reports/preference_sensitive.pdf)
- 42  
43 (11) O'Donnell J. Help me in my confusion: should we think more about mammography and  
44 colonoscopy as "preference sensitive care"? *Journal of Cancer Education* 2010;25(4):471-2.
- 45  
46 (12) Gyrd-Hansen D, Sogaard J. Analysing public preferences for cancer screening programs. *Health*  
47 *Economics* 2001;10:617-34.
- 48  
49 (13) Marshall DA, Johnson FR, Phillips KA, et al. Measuring patient preferences for colorectal cancer  
50 screening using a choice-format survey. *Value in Health* 2007 Sep;10(5):415-30.
- 51  
52 (14) Marshall DA, McGregor E, Currie G. Measuring preferences for colorectal cancer (CRC) screening –  
53 What are the implications for moving forward? *The Patient - Patient Centred Outcomes Research*  
54 2010;3(2):79-89.
- 55  
56 (15) Salkeld G, Solomon M, Short L, et al. Evidence-based consumer choice: a case study in colorectal  
57 cancer screening. *Australian & New Zealand Journal of Public Health* 2003;27(4):449-55.
- 58  
59 (16) Howard K, Salkeld G. Does Attribute Framing in Discrete Choice Experiments Influence Willingness  
60 to Pay? Results from a Discrete Choice Experiment in Screening for Colorectal Cancer. *Value in*  
*Health* 2009;121(2):354-3.
- (17) Lancsar E, Louviere J. Conducting discrete choice experiments to inform healthcare decision  
making: a user's guide. *Pharmacoeconomics* 2008;26(8):661-77.

- 1  
2  
3 (18) Bridges JF, Kinter E, Kidane L, et al. Things are looking up since we started listening to patients: Recent trends in the application of conjoint analysis in health 1970-2007. *The Patient - Patient Centred Outcomes Research* 2008;1(4):273-82.
- 4  
5  
6  
7 (19) Marshall DA, Bridges JF, Hauber AB, et al. Conjoint Analysis Applications in Health - How are studies being designed and reported? An update on current practice in the published literature between 2005 and 2008. *The Patient - Patient Centred Outcomes Research* 2010;3(4):249-56.
- 8  
9  
10 (20) Bridges JF, Hauber AB, Marshall DA, et al. Conjoint Analysis Applications in Health-a Checklist: A Report of the ISPOR Good Research Practices for Conjoint Analysis Task Force. *Value in Health* 2011;14(4):5.
- 11  
12  
13  
14 (21) Smith DP, King MT, Egger S, et al. Quality of life three years after diagnosis of localised prostate cancer: population based cohort study. *BMJ* 2009;339:b4817.
- 15  
16  
17 (22) Huber J., Zwerina K. The importance of utility balance in efficient choice design. *Journal of Marketing Research* 1996;XXXIII:307-17.
- 18  
19  
20 (23) Sandor Z, Wedel M. Profile construction in experimental designs for mixed logit models. *Marketing Science* 2002;21(4):455-75.
- 21  
22  
23 (24) Hensher DA, Rose JM, Greene WH. *Applied Choice Analysis. A Primer (1st ed.)*. Cambridge: Cambridge University Press, 2005.
- 24  
25 (25) Louviere J, Hensher DA, Swait JD. *Stated Choice Methods - Analysis and Application*. Cambridge: Cambridge University Press, 2000.
- 26  
27  
28 (26) Hensher DA, Greene WH. The mixed logit model: The state of practice. *Transportation* 2003;30:133-76.
- 29  
30  
31  
32  
33  
34  
35  
36  
37  
38  
39  
40  
41  
42  
43  
44  
45  
46  
47  
48  
49  
50  
51  
52  
53  
54  
55  
56  
57  
58  
59  
60

## Figures

Figure 1 Example of a discrete choice question

Please compare the two screening tests below. You have decided to have a screening test, and these are the two tests you have to choose from. Which test would you choose to have?

| Example                                                                                   | Test 1                                          | Test 2                                          |
|-------------------------------------------------------------------------------------------|-------------------------------------------------|-------------------------------------------------|
| How many cancers the test will find                                                       | 65 out of 100                                   | 55 out of 100                                   |
| How many large polyps the test will find                                                  | 35 out of 100                                   | 45 out of 100                                   |
| The number of people who are correctly reassured by the test that they do NOT have cancer | 800 out of 1000 people                          | 900 out of 1000 people                          |
| The cost to you of the test                                                               | \$20                                            | \$30                                            |
| Dietary or medication restrictions prior to test                                          | No                                              | No                                              |
| Collection of the stool sample                                                            | Brush stool surface gently then dab on test kit | Brush stool surface gently then dab on test kit |

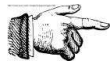

Which would you choose?

(please tick one box)

Test 1

Test 2
